# Supplementary material for: Therapeutic effects of PDGF-AB/BB against cellular senescence in human intervertebral disc
Source: eLife journal article supplement (doi:10.7554/elife.103073), 2024-12-18

NP samples #1 #2 #3

Chemi

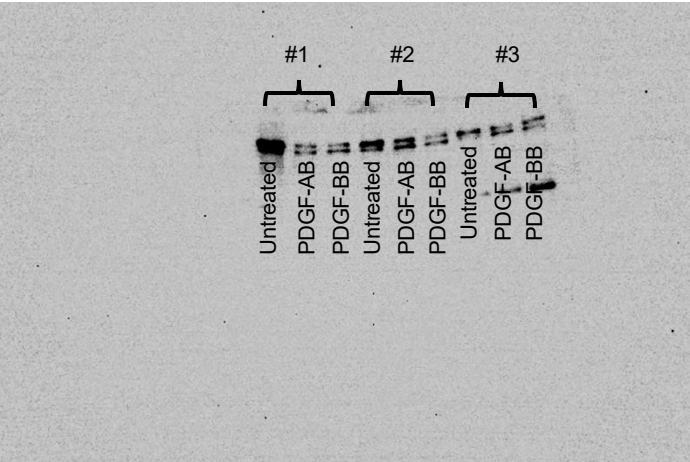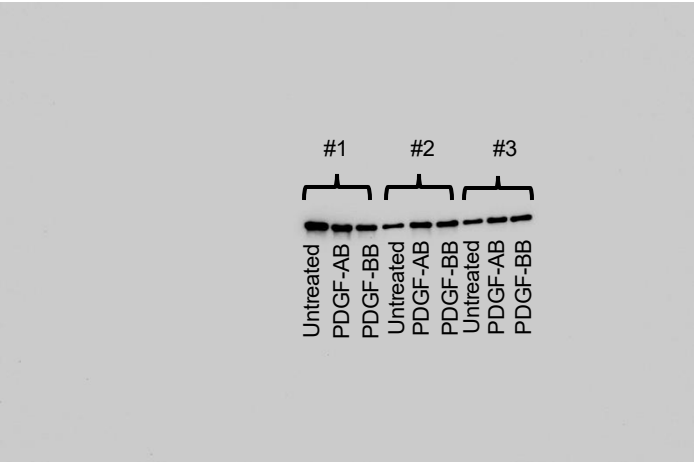

Overlay

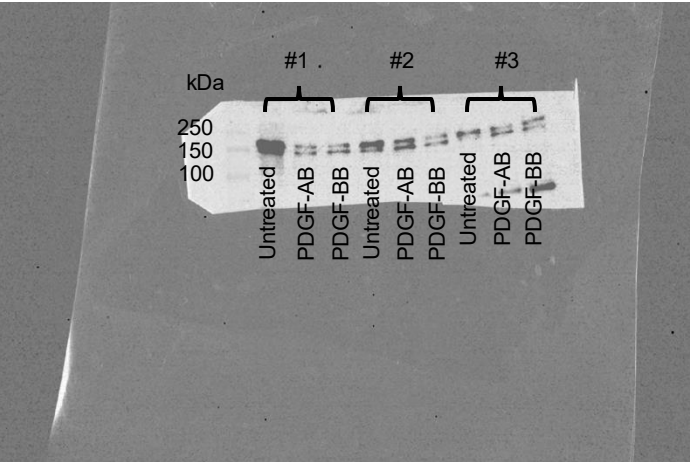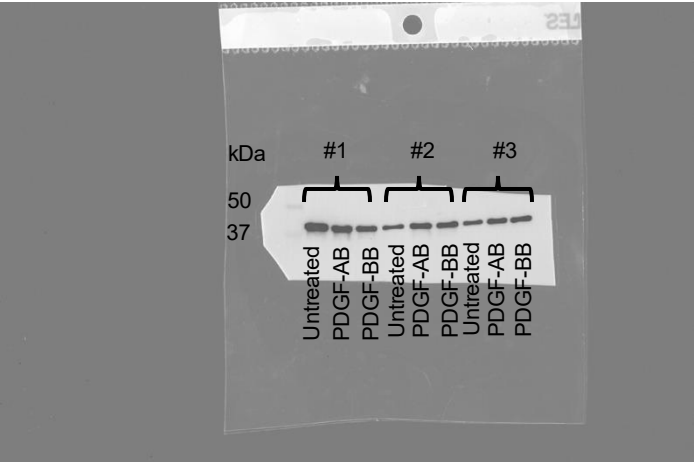

NP samples #4 #5

Chemi

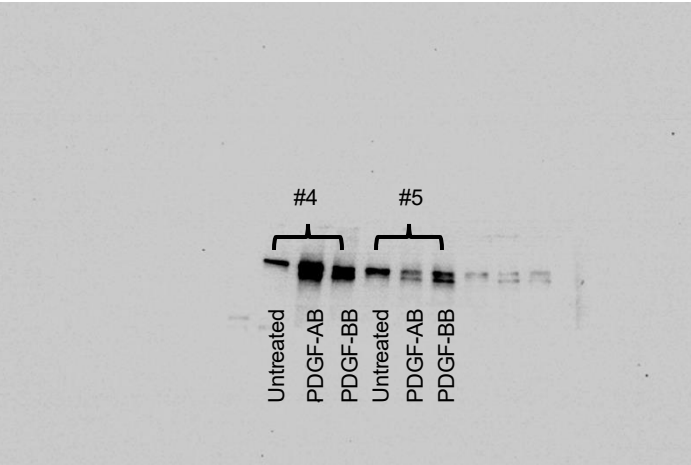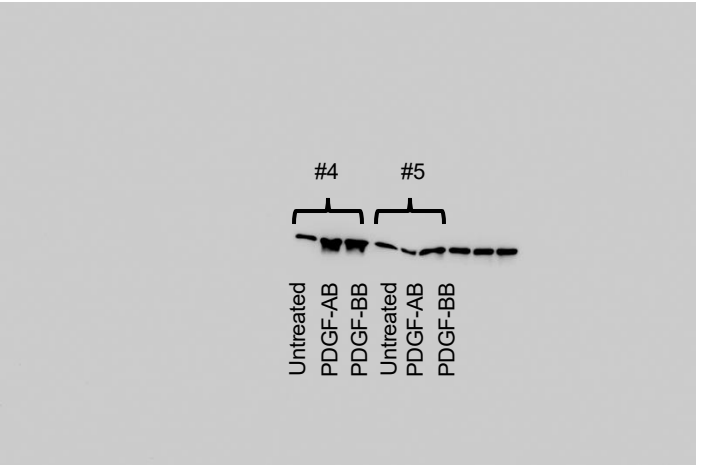

Overlay

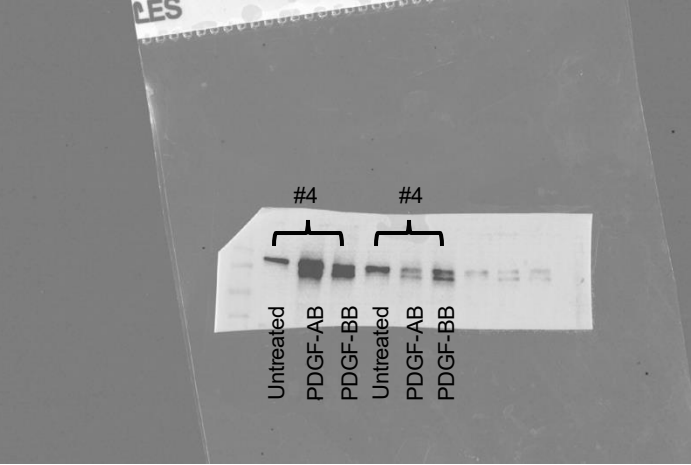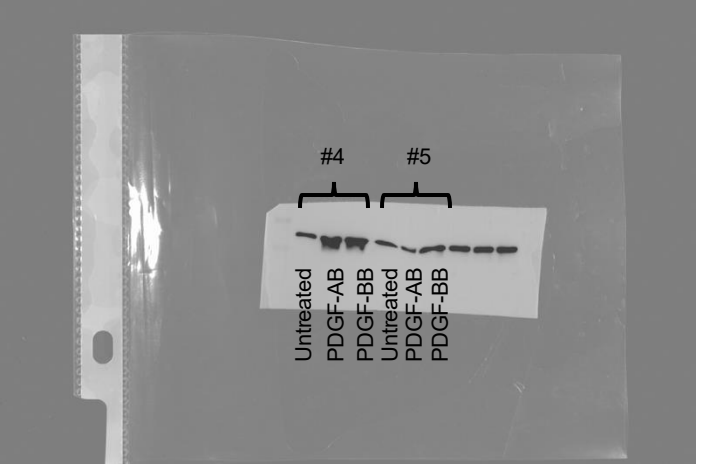

AF samples #1 #2 #3

Chemi

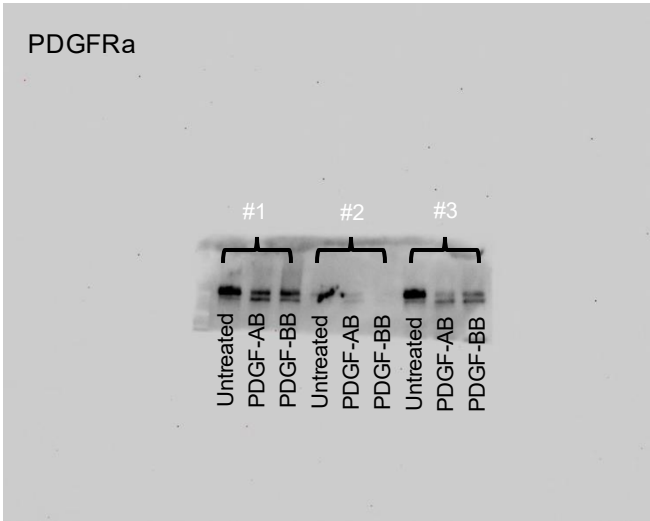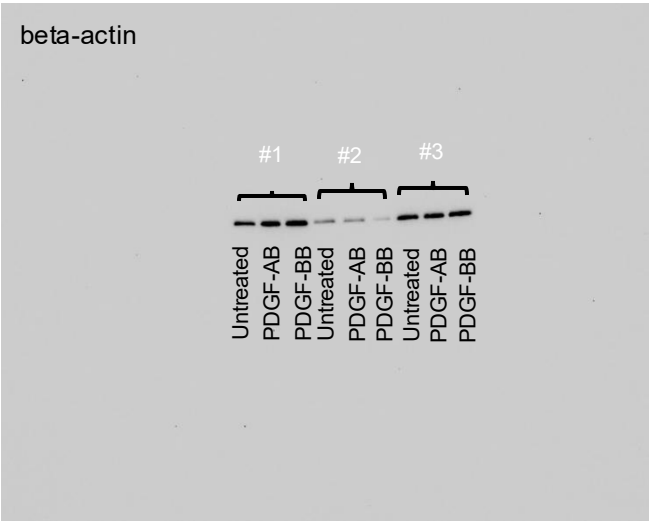

Overlay

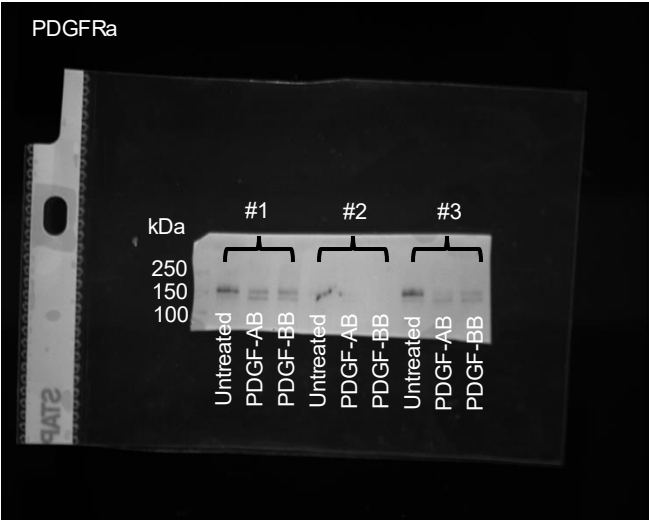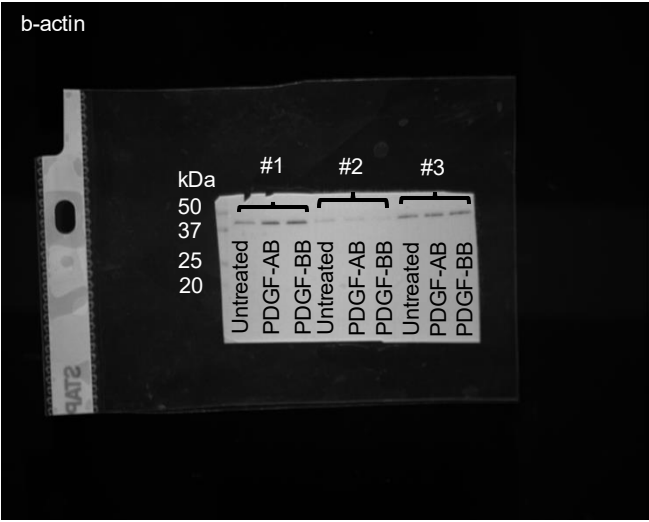

AF samples #4 #5 #6

Chemi

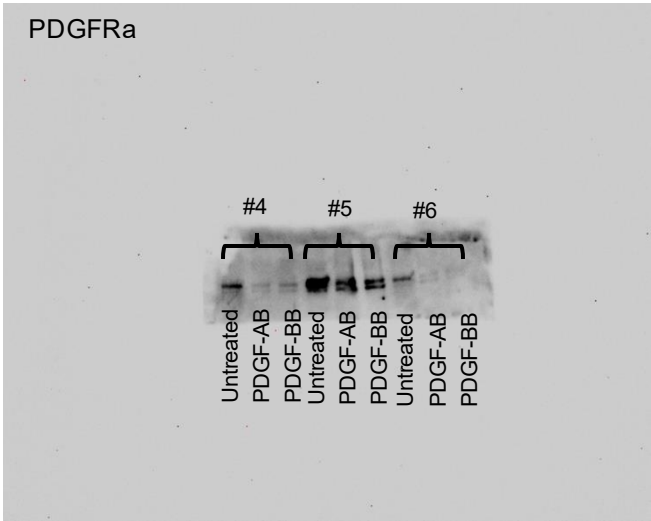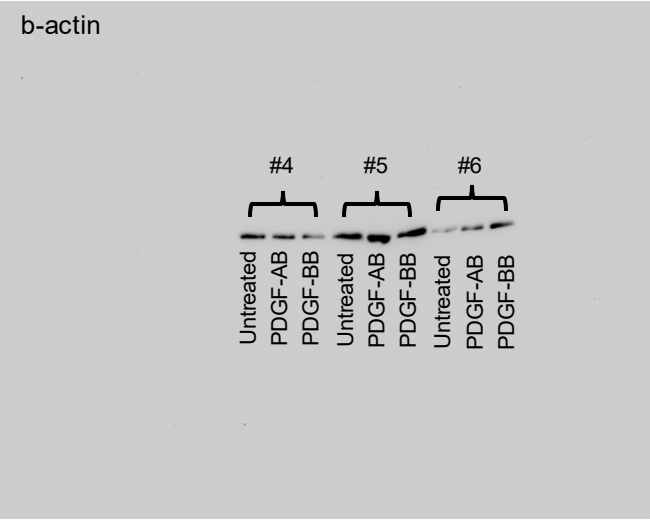

Overlay

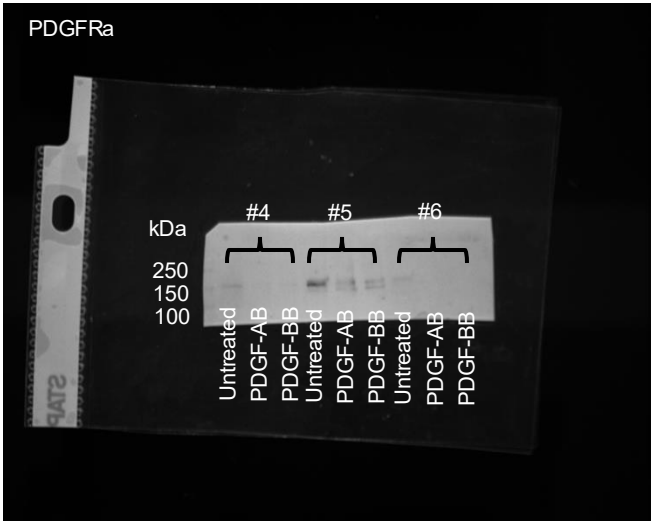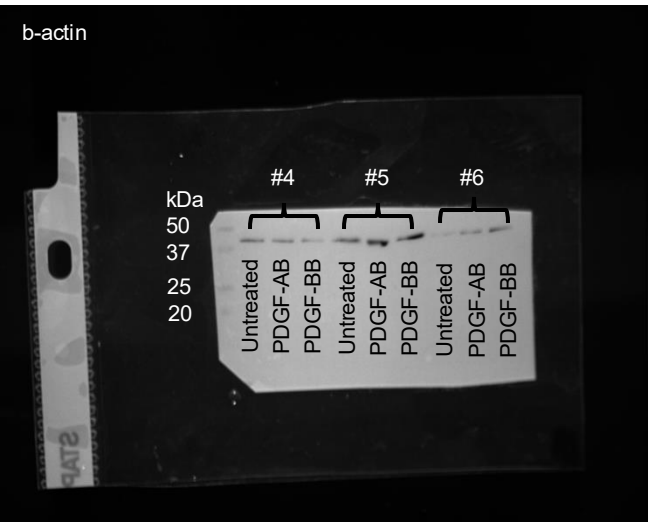

Supplement: fig3-figsupp1-data2 [file elife-103073-fig3-figsupp1-data2-v1.zip]
