# Supplementary material for: Therapeutic effects of PDGF-AB/BB against cellular senescence in human intervertebral disc
Source: eLife. 2025 Jul 16;13:RP103073. doi: 10.7554/eLife.103073 (PMC12266719; doi:10.7554/eLife.103073)
Supplement: Figure 3—figure supplement 1—source data 1. [file elife-103073-fig3-figsupp1-data1.xlsx]

## Sheet: Figure S2 NP
NP
Untreated	PDGF-AB	PDGF-BB
1.37449	0.659506	0.804365
1.7796	1.04156	0.710441
1.25745	0.963964	1.00999
1.02602	1.29082	0.919995
1.35834	1.54825	1.04591
Table Analyzed	NP
Data sets analyzed	A-C
ANOVA summary
F	3.858
P value	0.0508
P value summary	ns
Significant diff. among means (P < 0.05)?	No
R squared	0.3914
Brown-Forsythe test
F (DFn, DFd)	0.7920 (2, 12)
P value	0.4753
P value summary	ns
Are SDs significantly different (P < 0.05)?	No
Bartlett's test
Bartlett's statistic (corrected)	2.476
P value	0.2899
P value summary	ns
Are SDs significantly different (P < 0.05)?	No
ANOVA table	SS	DF	MS	F (DFn, DFd)	P value
Treatment (between columns)	0.534	2	0.267	F (2, 12) = 3.858	P=0.0508
Residual (within columns)	0.8305	12	0.06921
Total	1.364	14
Model comparison	SS	DF	Probability it is correct
Null H. All population means identical	1.364	14	44.43%
Alternative H: Distinct population means	0.8305	12	55.57%
Ratio of probabilities			1.251
Difference in AICc			0.4477
Data summary
Number of treatments (columns)	3
Number of values (total)	15
Number of families	1
Number of comparisons per family	2
Alpha	0.05
Dunnett's multiple comparisons test	Mean Diff.	95.00% CI of diff.	Below threshold?	Summary	Adjusted P Value	?-A
PDGF-AB vs. Untreated	-0.2584	-0.6747 to 0.1580	No	ns	0.2458	B	PDGF-AB
PDGF-BB vs. Untreated	-0.461	-0.8774 to -0.04467	Yes	*	0.0308	C	PDGF-BB
Test details	Mean 1	Mean 2	Mean Diff.	SE of diff.	n1	n2	q	DF
PDGF-AB vs. Untreated	1.101	1.359	-0.2584	0.1664	5	5	1.553	12
PDGF-BB vs. Untreated	0.8981	1.359	-0.461	0.1664	5	5	2.771	12

## Sheet: Figure S2 AF
AF
Untreated	PDGF-AB	PDGF-BB
0.95	0.533	0.464
1.57	0.749	0.755
0.807	0.313	0.411
0.598	0.198	0.498
0.632	0.436	0.359
1.444	0.189	0.142
Table Analyzed	AF
Data sets analyzed	A-C
ANOVA summary
F	7.823
P value	0.0047
P value summary	**
Significant diff. among means (P < 0.05)?	Yes
R squared	0.5105
Brown-Forsythe test
F (DFn, DFd)	1.827 (2, 15)
P value	0.1949
P value summary	ns
Are SDs significantly different (P < 0.05)?	No
Bartlett's test
Bartlett's statistic (corrected)	3.174
P value	0.2046
P value summary	ns
Are SDs significantly different (P < 0.05)?	No
ANOVA table	SS	DF	MS	F (DFn, DFd)	P value
Treatment (between columns)	1.347	2	0.6737	F (2, 15) = 7.823	P=0.0047
Residual (within columns)	1.292	15	0.08612
Total	2.639	17
Model comparison	SS	DF	Probability it is correct
Null H. All population means identical	2.639	17	3.587%
Alternative H: Distinct population means	1.292	15	96.41%
Ratio of probabilities			26.88
Difference in AICc			6.583
Data summary
Number of treatments (columns)	3
Number of values (total)	18
Number of families	1
Number of comparisons per family	2
Alpha	0.05
Dunnett's multiple comparisons test	Mean Diff.	95.00% CI of diff.	Below threshold?	Summary	Adjusted P Value	?-A
PDGF-AB vs. Untreated	-0.5972	-1.010 to -0.1839	Yes	**	0.0058	B	PDGF-AB
PDGF-BB vs. Untreated	-0.562	-0.9753 to -0.1487	Yes	**	0.0088	C	PDGF-BB
Test details	Mean 1	Mean 2	Mean Diff.	SE of diff.	n1	n2	q	DF
PDGF-AB vs. Untreated	0.403	1	-0.5972	0.1694	6	6	3.525	15
PDGF-BB vs. Untreated	0.4382	1	-0.562	0.1694	6	6	3.317	15
