# Supplementary material for: Therapeutic effects of PDGF-AB/BB against cellular senescence in human intervertebral disc
Source: eLife. 2025 Jul 16;13:RP103073. doi: 10.7554/eLife.103073 (PMC12266719; doi:10.7554/eLife.103073)
Supplement: Figure 3—source data 1. [file elife-103073-fig3-data1.xlsx]

## Sheet: Fig.3F+G
PDGFRA in NP						PDGFRA in AF
Untreated	PDGF-AB	PDGF-BB				Untreated	PDGF-AB	PDGF-BB
1.01	2	1.82				1.01	1.04	1.24
1	2.69	2.25				1.03	2.21	2.4
1	2.59	1.88				1	0.74	0.6
1	3.41	3.51				1	2.96	1.03
1.01	1.22	2.67				1.01	3.76	3.92
						1	3.26	2.43
Table Analyzed	PDGFR NP					Table Analyzed	PDGFR AF
Data sets analyzed	A-C					Data sets analyzed	A-C
ANOVA summary						ANOVA summary
F	8.487					F	2.758
P value	0.005					P value	0.0955
P value summary	**					P value summary	ns
Significant diff. among means (P < 0.05)?	Yes					Significant diff. among means (P < 0.05)?	No
R squared	0.5858					R squared	0.2688
Brown-Forsythe test						Brown-Forsythe test
F (DFn, DFd)	2.736 (2, 12)					F (DFn, DFd)	7.732 (2, 15)
P value	0.105					P value	0.0049
P value summary	ns					P value summary	**
Are SDs significantly different (P < 0.05)?	No					Are SDs significantly different (P < 0.05)?	Yes
Bartlett's test						Bartlett's test
Bartlett's statistic (corrected)	31.24					Bartlett's statistic (corrected)	37.13
P value	<0.0001					P value	<0.0001
P value summary	****					P value summary	****
Are SDs significantly different (P < 0.05)?	Yes					Are SDs significantly different (P < 0.05)?	Yes
ANOVA table	SS	DF	MS	F (DFn, DFd)	P value	ANOVA table	SS	DF	MS	F (DFn, DFd)	P value
Treatment (between columns)	6.538	2	3.269	F (2, 12) = 8.487	P=0.0050	Treatment (between columns)	5.515	2	2.758	F (2, 15) = 2.758	P=0.0955
Residual (within columns)	4.622	12	0.3852			Residual (within columns)	15	15	1
Total	11.16	14				Total	20.51	17
Model comparison	SS	DF	Probability it is correct			Model comparison	SS	DF	Probability it is correct
Null H. All population means identical	11.16	14	4.264%			Null H. All population means identical	20.51	17	57.94%
Alternative H: Distinct population means	4.622	12	95.74%			Alternative H: Distinct population means	15	15	42.06%
Ratio of probabilities			22.45			Ratio of probabilities			1.378
Difference in AICc			6.223			Difference in AICc			-0.6407
Data summary						Data summary
Number of treatments (columns)	3					Number of treatments (columns)	3
Number of values (total)	15					Number of values (total)	18
IL6 in NP						IL6 in AF
Untreated	PDGF-AB	PDGF-BB				Untreated	PDGF-AB	PDGF-BB
1	0.45	0.27				1	0.81	0.06
1	0.6	0.48				1.01	0.27	0.36
1.03	0.86	1.09				1	0.05	0.05
1	0.37	0.19				1	0.66	0.55
1.01	0.19	0.22				1	0.33	0.22
						1	0.58	0.19
Table Analyzed	IL6 NP					Table Analyzed	IL6 AF
Data sets analyzed	A-C					Data sets analyzed	A-C
ANOVA summary						ANOVA summary
F	7.051					F	24.13
P value	0.0094					P value	<0.0001
P value summary	**					P value summary	****
Significant diff. among means (P < 0.05)?	Yes					Significant diff. among means (P < 0.05)?	Yes
R squared	0.5403					R squared	0.7628
Brown-Forsythe test						Brown-Forsythe test
F (DFn, DFd)	1.474 (2, 12)					F (DFn, DFd)	8.435 (2, 15)
P value	0.2677					P value	0.0035
P value summary	ns					P value summary	**
Are SDs significantly different (P < 0.05)?	No					Are SDs significantly different (P < 0.05)?	Yes
Bartlett's test						Bartlett's test
Bartlett's statistic (corrected)	19.22					Bartlett's statistic (corrected)	32.54
P value	<0.0001					P value	<0.0001
P value summary	****					P value summary	****
Are SDs significantly different (P < 0.05)?	Yes					Are SDs significantly different (P < 0.05)?	Yes
ANOVA table	SS	DF	MS	F (DFn, DFd)	P value	ANOVA table	SS	DF	MS	F (DFn, DFd)	P value
Treatment (between columns)	0.9625	2	0.4812	F (2, 12) = 7.051	P=0.0094	Treatment (between columns)	1.864	2	0.9318	F (2, 15) = 24.13	P<0.0001
Residual (within columns)	0.819	12	0.06825			Residual (within columns)	0.5794	15	0.03862
Total	1.781	14				Total	2.443	17
Model comparison	SS	DF	Probability it is correct			Model comparison	SS	DF	Probability it is correct
Null H. All population means identical	1.781	14	8.88%			Null H. All population means identical	2.443	17	<0.01%
Alternative H: Distinct population means	0.819	12	91.12%			Alternative H: Distinct population means	0.5794	15	>99.99%
Ratio of probabilities			10.26			Ratio of probabilities			>9999
Difference in AICc			4.657			Difference in AICc			19.63
Data summary						Data summary
Number of treatments (columns)	3					Number of treatments (columns)	3
Number of values (total)	15					Number of values (total)	18
