# Supplementary material for: Therapeutic effects of PDGF-AB/BB against cellular senescence in human intervertebral disc
Source: eLife. 2025 Jul 16;13:RP103073. doi: 10.7554/eLife.103073 (PMC12266719; doi:10.7554/eLife.103073)
Supplement: Figure 4—source data 1. [file elife-103073-fig4-data1.xlsx]

## Sheet: Fig.4B
MTT
0Gy	5Gy	10Gy
114.75	56.1	49.51
103.28	46.93	53.01
90.16	74.59	37.7
92.95	56.97	17.54
ANOVA summary
F	22.56
P value	0.0003
P value summary	***
Significant diff. among means (P < 0.05)?	Yes
R squared	0.8337
Brown-Forsythe test
F (DFn, DFd)	0.3510 (2, 9)
P value	0.7132
P value summary	ns
Are SDs significantly different (P < 0.05)?	No
Bartlett's test
Bartlett's statistic (corrected)	0.435
P value	0.8045
P value summary	ns
Are SDs significantly different (P < 0.05)?	No
ANOVA table	SS	DF	MS	F (DFn, DFd)	P value
Treatment (between columns)	7740	2	3870	F (2, 9) = 22.56	P=0.0003
Residual (within columns)	1543	9	171.5
Total	9283	11
Model comparison	SS	DF	Probability it is correct
Null H. All population means identical	9283	11	0.1394%
Alternative H: Distinct population means	1543	9	99.86%
Ratio of probabilities			716.6
Difference in AICc			13.15
Data summary
Number of treatments (columns)	3
Number of values (total)	12
Number of families	1
Number of comparisons per family	2
Alpha	0.05
Dunnett's multiple comparisons test	Mean Diff.	95.00% CI of diff.	Below threshold?	Summary	Adjusted P Value	A-?
0Gy vs. 5Gy	41.64	17.43 to 65.84	Yes	**	0.0028	G
0Gy vs. 10Gy	60.85	36.64 to 85.05	Yes	***	0.0002	H
Test details	Mean 1	Mean 2	Mean Diff.	SE of diff.	n1	n2
0Gy vs. 5Gy	100.3	58.65	41.64	9.26	4	4
0Gy vs. 10Gy	100.3	39.44	60.85	9.26	4	4

## Sheet: Fig.4D
p21
0Gy	5Gy	10Gy
3.9	23	51.9
1.2	48	44.7
2.1	47	65.2
3.7	34	60
ANOVA summary
F	38.71
P value	<0.0001
P value summary	****
Significant diff. among means (P < 0.05)?	Yes
R squared	0.8959
Brown-Forsythe test
F (DFn, DFd)	5.358 (2, 9)
P value	0.0293
P value summary	*
Are SDs significantly different (P < 0.05)?	Yes
Bartlett's test
Bartlett's statistic (corrected)	8.021
P value	0.0181
P value summary	*
Are SDs significantly different (P < 0.05)?	Yes
ANOVA table	SS	DF	MS	F (DFn, DFd)	P value
Treatment (between columns)	5772	2	2886	F (2, 9) = 38.71	P<0.0001
Residual (within columns)	671	9	74.55
Total	6443	11
Data summary
Number of treatments (columns)	3
Number of values (total)	12
Number of families	1
Number of comparisons per family	2
Alpha	0.05
Dunnett's multiple comparisons test	Mean Diff.	95.00% CI of diff.	Below threshold?	Summary	Adjusted P Value	A-?
0Gy vs. 5Gy	-35.28	-51.24 to -19.31	Yes	***	0.0005	B	5Gy
0Gy vs. 10Gy	-52.73	-68.69 to -36.76	Yes	****	<0.0001	C	10Gy
Test details	Mean 1	Mean 2	Mean Diff.	SE of diff.	n1	n2	q	DF
0Gy vs. 5Gy	2.725	38	-35.28	6.105	4	4	5.778	9
0Gy vs. 10Gy	2.725	55.45	-52.73	6.105	4	4	8.636	9

## Sheet: Fig.4F
P16
0Gy	5Gy	10Gy
5.9	58	50
14.3	24	55
4.3	17	81
13	40	64
ANOVA summary
F	15.58
P value	0.0012
P value summary	**
Significant diff. among means (P < 0.05)?	Yes
R squared	0.7759
Brown-Forsythe test
F (DFn, DFd)	2.190 (2, 9)
P value	0.1679
P value summary	ns
Are SDs significantly different (P < 0.05)?	No
Bartlett's test
Bartlett's statistic (corrected)	3.515
P value	0.1724
P value summary	ns
Are SDs significantly different (P < 0.05)?	No
ANOVA table	SS	DF	MS	F (DFn, DFd)	P value
Treatment (between columns)	5648	2	2824	F (2, 9) = 15.58	P=0.0012
Residual (within columns)	1631	9	181.2
Total	7279	11
Data summary
Number of treatments (columns)	3
Number of values (total)	12
Number of families	1
Number of comparisons per family	2
Alpha	0.05
Dunnett's multiple comparisons test	Mean Diff.	95.00% CI of diff.	Below threshold?	Summary	Adjusted P Value	A-?
0Gy vs. 5Gy	-25.38	-50.26 to -0.4913	Yes	*	0.046	B	5Gy
0Gy vs. 10Gy	-53.13	-78.01 to -28.24	Yes	***	0.0006	C	10Gy
Test details	Mean 1	Mean 2	Mean Diff.	SE of diff.	n1	n2	q	DF
0Gy vs. 5Gy	9.375	34.75	-25.38	9.519	4	4	2.666	9
0Gy vs. 10Gy	9.375	62.5	-53.13	9.519	4	4	5.581	9

## Sheet: Fig.4G
D7
P21			P16			CASPASE3
0Gy	10Gy		0Gy	10Gy		0Gy	10Gy
1.19	1.13		1	0.4		0.97	0.43
0.6	0.88		0.46	0.57		0.85	0.56
1.54	2.41		0.55	0.52		1.22	0.55
1.01	0.71		4.35	0.11		1.63	0.57
Unpaired t test			Unpaired t test			Unpaired t test
P value	0.6639		P value	0.2494		P value	0.0107
P value summary	ns		P value summary	ns		P value summary	*
Significantly different (P < 0.05)?	No		Significantly different (P < 0.05)?	No		Significantly different (P < 0.05)?	Yes
One- or two-tailed P value?	Two-tailed		One- or two-tailed P value?	Two-tailed		One- or two-tailed P value?	Two-tailed
t, df	t=0.4568, df=6		t, df	t=1.275, df=6		t, df	t=3.648, df=6
How big is the difference?			How big is the difference?			How big is the difference?
Mean of column A	1.085		Mean of column A	1.59		Mean of column A	1.168
Mean of column B	1.283		Mean of column B	0.4		Mean of column B	0.5275
Difference between means (B - A) ± SEM	0.1975 ± 0.4324		Difference between means (B - A) ± SEM	-1.190 ± 0.9333		Difference between means (B - A) ± SEM	-0.6400 ± 0.1754
95% confidence interval	-0.8604 to 1.255		95% confidence interval	-3.474 to 1.094		95% confidence interval	-1.069 to -0.2107
R squared (eta squared)	0.03361		R squared (eta squared)	0.2132		R squared (eta squared)	0.6892
F test to compare variances			F test to compare variances			F test to compare variances
F, DFn, Dfd	3.888, 3, 3		F, DFn, Dfd	81.04, 3, 3		F, DFn, Dfd	27.69, 3, 3
P value	0.2941		P value	0.0046		P value	0.0219
P value summary	ns		P value summary	**		P value summary	*
Significantly different (P < 0.05)?	No		Significantly different (P < 0.05)?	Yes		Significantly different (P < 0.05)?	Yes
Data analyzed			Data analyzed			Data analyzed
Sample size, column A	4		Sample size, column A	4		Sample size, column A	4
Sample size, column B	4		Sample size, column B	4		Sample size, column B	4

## Sheet: Fig.4H
P21			P16			CASPASE3			IL6			PDGFRA
0Gy	10Gy		0Gy	10Gy		0Gy	10Gy		0Gy	10Gy		0Gy	10Gy
1.06328	2.12514		1	1.69		0.887492	0.635091		1.68471	0.388244		0.81	0.16
1.11828	3.89402		1	2.2		1.00362	0.602898		0.885408	0.416459		1.25	0.48
0.592727	1.7621		1.01	1.65		0.986446	0.561556		1.1568	0.286389		0.72	0.16
1.43169	2.92985		1	0.96		1.14132	0.517682		0.584392	0.430796		1.38	0.38
Unpaired t test			Unpaired t test			Unpaired t test			Unpaired t test			Unpaired t test
P value	0.018		P value	0.0501		P value	0.0003		P value	0.0254		P value	0.0062
P value summary	*		P value summary	ns		P value summary	***		P value summary	*		P value summary	**
Significantly different (P < 0.05)?	Yes		Significantly different (P < 0.05)?	No		Significantly different (P < 0.05)?	Yes		Significantly different (P < 0.05)?	Yes		Significantly different (P < 0.05)?	Yes
One- or two-tailed P value?	Two-tailed		One- or two-tailed P value?	Two-tailed		One- or two-tailed P value?	Two-tailed		One- or two-tailed P value?	Two-tailed		One- or two-tailed P value?	Two-tailed
t, df	t=3.228, df=6		t, df	t=2.445, df=6		t, df	t=7.321, df=6		t, df	t=2.956, df=6		t, df	t=4.117, df=6
How big is the difference?			How big is the difference?			How big is the difference?			How big is the difference?			How big is the difference?
Mean of column A	1.051		Mean of column A	1.003		Mean of column A	1.005		Mean of column A	1.078		Mean of column A	1.04
Mean of column B	2.678		Mean of column E	1.625		Mean of column B	0.5793		Mean of column B	0.3805		Mean of column B	0.295
Difference between means (B - A) ± SEM	1.626 ± 0.5038		Difference between means (E - A) ± SEM	0.6225 ± 0.2546		Difference between means (B - A) ± SEM	-0.4254 ± 0.05811		Difference between means (B - A) ± SEM	-0.6974 ± 0.2359		Difference between means (B - A) ± SEM	-0.7450 ± 0.1809
95% confidence interval	0.3934 to 2.859		95% confidence interval	-0.0004522 to 1.245		95% confidence interval	-0.5676 to -0.2832		95% confidence interval	-1.275 to -0.1201		95% confidence interval	-1.188 to -0.3022
R squared (eta squared)	0.6346		R squared (eta squared)	0.4991		R squared (eta squared)	0.8993		R squared (eta squared)	0.5929		R squared (eta squared)	0.7386
F test to compare variances			F test to compare variances			F test to compare variances			F test to compare variances			F test to compare variances
F, DFn, Dfd	7.471, 3, 3		F, DFn, Dfd	10369, 3, 3		F, DFn, Dfd	4.207, 3, 3		F, DFn, Dfd	51.42, 3, 3		F, DFn, Dfd	4.044, 3, 3
P value	0.1327		P value	<0.0001		P value	0.2687		P value	0.0089		P value	0.2812
P value summary	ns		P value summary	****		P value summary	ns		P value summary	**		P value summary	ns
Significantly different (P < 0.05)?	No		Significantly different (P < 0.05)?	Yes		Significantly different (P < 0.05)?	No		Significantly different (P < 0.05)?	Yes		Significantly different (P < 0.05)?	No
Data analyzed			Data analyzed			Data analyzed			Data analyzed			Data analyzed
Sample size, column A	4		Sample size, column A	4		Sample size, column A	4		Sample size, column A	4		Sample size, column A	4
Sample size, column B	4		Sample size, column E	4		Sample size, column B	4		Sample size, column B	4		Sample size, column B	4
