# Supplementary material for: Therapeutic effects of PDGF-AB/BB against cellular senescence in human intervertebral disc
Source: eLife. 2025 Jul 16;13:RP103073. doi: 10.7554/eLife.103073 (PMC12266719; doi:10.7554/eLife.103073)
Supplement: Figure 5—source data 1. [file elife-103073-fig5-data1.xlsx]

## Sheet: Fig.5C
	G0 phase					S					G2/M
10Gy	70.87	76.78	68.66	68.04		4.83	4.13	3.32	4.24		24.26	18.59	27.45	27.27
10Gy+AB	73.27	70.38	72.7	62.69		6.92	5.21	5.89	4.13		19.68	24.05	20.88	32.84
10Gy+BB	69.48	71.82	70.51	66.5		5.6	4.87	5.41	5.49		24.82	22.97	23.22	27.56
Two-way RM ANOVA	Matching: Across row
Assume sphericity?	No
Alpha	0.05
Source of Variation	% of total variation	P value	P value summary	Significant?	Geisser-Greenhouse's epsilon
Treatment x Cell cycle	0.03782	0.9611	ns	No
Treatment	2.334e-05	0.8589	ns	No
Cell cycle	98.82	<0.0001	****	Yes	0.5149
Subject	0.0006792	>0.9999	ns	No
ANOVA table	SS	DF	MS	F (DFn, DFd)	P value
Treatment x Cell cycle	10.27	4	2.567	F (4, 18) = 0.1489	P=0.9611
Treatment	0.006339	2	0.003169	F (2, 9) = 0.1547	P=0.8589
Cell cycle	26832	2	13416	F (1.030, 9.268) = 777.9	P<0.0001
Subject	0.1844	9	0.02049	F (9, 18) = 0.001188	P>0.9999
Residual	310.5	18	17.25
Data summary
Number of columns (Cell cycle)	3
Number of rows (Treatment)	3
Number of subjects (Subject)	12
Number of missing values	0
Number of families	3
Number of comparisons per family	2
Alpha	0.05
Dunnett's multiple comparisons test	Mean Diff.	95.00% CI of diff.	Below threshold?	Summary	Adjusted P Value
G0
10Gy vs. 10Gy+AB	1.328	-7.788 to 10.44	No	ns	0.8819
10Gy vs. 10Gy+BB	1.51	-5.561 to 8.581	No	ns	0.7488
S
10Gy vs. 10Gy+AB	-1.408	-3.487 to 0.6718	No	ns	0.1534
10Gy vs. 10Gy+BB	-1.213	-2.314 to -0.1106	Yes	*	0.0364
G2/M
10Gy vs. 10Gy+AB	0.03	-10.70 to 10.76	No	ns	>0.9999
10Gy vs. 10Gy+BB	-0.25	-7.588 to 7.088	No	ns	0.9915
Test details	Mean 1	Mean 2	Mean Diff.	SE of diff.	N1	N2	q	DF
G0
10Gy vs. 10Gy+AB	71.09	69.76	1.328	3.149	4	4	0.4216	5.771
10Gy vs. 10Gy+BB	71.09	69.58	1.51	2.291	4	4	0.659	4.754
S
10Gy vs. 10Gy+AB	4.13	5.538	-1.408	0.6635	4	4	2.121	4.562
10Gy vs. 10Gy+BB	4.13	5.343	-1.213	0.3505	4	4	3.459	4.523
G2/M
10Gy vs. 10Gy+AB	24.39	24.36	0.03	3.621	4	4	0.008285	5.353
10Gy vs. 10Gy+BB	24.39	24.64	-0.25	2.322	4	4	0.1077	4.463

## Sheet: Fig.5D
	G0 phase					S					G2/M
10Gy	63.24	73.91	67.59	87.5		4.25	5	5.38	4		32.51	22.04	27.55	9.63
10Gy+AB	60.25	68.61	66.03	80.61		5.68	7.3	6.72	7		34.07	24.57	27.72	13.4
10Gy+BB	59.9	70.79	63.61	75.86		5.75	6.5	6.93	7		34.34	23.57	30.13	18.16
Two-way RM ANOVA	Matching: Across row
Assume sphericity?	No
Alpha	0.05
Source of Variation	% of total variation	P value	P value summary	Significant?	Geisser-Greenhouse's epsilon
Treatment x Cell cycle	0.3681	0.8543	ns	No
Treatment	0.0005232	0.4975	ns	No
Cell cycle	94.61	<0.0001	****	Yes	0.5044
Subject	0.003118	>0.9999	ns	No
ANOVA table	SS	DF	MS	F (DFn, DFd)	P value
Treatment x Cell cycle	101.4	4	25.36	F (4, 18) = 0.3298	P=0.8543
Treatment	0.1442	2	0.07208	F (2, 9) = 0.7552	P=0.4975
Cell cycle	26064	2	13032	F (1.009, 9.080) = 169.5	P<0.0001
Subject	0.859	9	0.09544	F (9, 18) = 0.001241	P>0.9999
Residual	1384	18	76.88
Data summary
Number of columns (Cell cycle)	3
Number of rows (Treatment)	3
Number of subjects (Subject)	12
Number of missing values	0
Number of families	3
Number of comparisons per family	2
Alpha	0.05
Dunnett's multiple comparisons test	Mean Diff.	95.00% CI of diff.	Below threshold?	Summary	Adjusted P Value
G0
10Gy vs. 10Gy+AB	4.185	-15.54 to 23.91	No	ns	0.7732
10Gy vs. 10Gy+BB	5.52	-13.49 to 24.53	No	ns	0.6221
S
10Gy vs. 10Gy+AB	-1.768	-3.873 to 0.3384	No	ns	0.0911
10Gy vs. 10Gy+BB	-1.888	-3.750 to -0.02523	Yes	*	0.0479
G2/M
10Gy vs. 10Gy+AB	-2.008	-20.85 to 16.84	No	ns	0.9346
10Gy vs. 10Gy+BB	-3.618	-21.51 to 14.27	No	ns	0.7855
Test details	Mean 1	Mean 2	Mean Diff.	SE of diff.	N1	N2	q	DF
G0
10Gy vs. 10Gy+AB	73.06	68.88	4.185	6.806	4	4	0.6149	5.752
10Gy vs. 10Gy+BB	73.06	67.54	5.52	6.385	4	4	0.8646	5.271
S
10Gy vs. 10Gy+AB	4.408	6.175	-1.768	0.7355	4	4	2.403	5.998
10Gy vs. 10Gy+BB	4.408	6.295	-1.888	0.5868	4	4	3.217	4.417
G2/M
10Gy vs. 10Gy+AB	22.93	24.94	-2.008	6.552	4	4	0.3064	5.902
10Gy vs. 10Gy+BB	22.93	26.55	-3.618	6.08	4	4	0.595	5.47
