# Supplementary material for: Therapeutic effects of PDGF-AB/BB against cellular senescence in human intervertebral disc
Source: eLife. 2025 Jul 16;13:RP103073. doi: 10.7554/eLife.103073 (PMC12266719; doi:10.7554/eLife.103073)
Supplement: Figure 6—source data 1. [file elife-103073-fig6-data1.xlsx]

## Sheet: Fig.6A
PDGFRA										P21										P16							CASPASE3							IL6
0Gy	10Gy	10Gy+AB	10Gy+BB							0Gy	10Gy	10Gy+AB	10Gy+BB							0Gy	10Gy	10Gy+AB	10Gy+BB				0Gy	10Gy	10Gy+AB	10Gy+BB				0Gy	10Gy	10Gy+AB	10Gy+BB
1	2.04	2.36	0.44							1.001	2.04	2.36	0.44							1	1.69	2.03	0.28				1	0.45	0.54	0.54				1	1.38	0.87	0.86
1.01	2.98152	1.72309	1.34258							1	2.98152	1.72309	1.34258							1	2.2	1.4	1.2				1.001	0.6	0.66	0.66				1	0.47	0.24	0.26
1	3.48222	1.62546	1.54176							1	3.48222	1.62546	1.54176							1.01	1.65	1.62	1.06				1	0.57	0.64	0.69				1.0001	1.02	0.23	0.14
1	1.57	0.84	0.5							1	1.57	0.84	0.5							1	0.96	1.42	0.88				1	0.45	0.39	0.52				1	1.42	0.27	0.28
ANOVA summary										ANOVA summary										ANOVA summary							ANOVA summary							ANOVA summary
F	32.92									F	5.807									F	5.141						F	27.81						F	5.608
P value	<0.0001									P value	0.0109									P value	0.0163						P value	<0.0001						P value	0.0122
P value summary	****									P value summary	*									P value summary	*						P value summary	****						P value summary	*
Significant diff. among means (P < 0.05)?	Yes									Significant diff. among means (P < 0.05)?	Yes									Significant diff. among means (P < 0.05)?	Yes						Significant diff. among means (P < 0.05)?	Yes						Significant diff. among means (P < 0.05)?	Yes
R squared	0.8917									R squared	0.5921									R squared	0.5624						R squared	0.8743						R squared	0.5837
Brown-Forsythe test										Brown-Forsythe test										Brown-Forsythe test							Brown-Forsythe test							Brown-Forsythe test
F (DFn, DFd)	1.002 (3, 12)									F (DFn, DFd)	5.450 (3, 12)									F (DFn, DFd)	1.275 (3, 12)						F (DFn, DFd)	4.535 (3, 12)						F (DFn, DFd)	1.211 (3, 12)
P value	0.4253									P value	0.0135									P value	0.3271						P value	0.024						P value	0.3478
P value summary	ns									P value summary	*									P value summary	ns						P value summary	*						P value summary	ns
Are SDs significantly different (P < 0.05)?	No									Are SDs significantly different (P < 0.05)?	Yes									Are SDs significantly different (P < 0.05)?	No						Are SDs significantly different (P < 0.05)?	Yes						Are SDs significantly different (P < 0.05)?	No
Bartlett's test										Bartlett's test										Bartlett's test							Bartlett's test							Bartlett's test
Bartlett's statistic (corrected)	17.44									Bartlett's statistic (corrected)	35.69									Bartlett's statistic (corrected)	20.98						Bartlett's statistic (corrected)	25.4						Bartlett's statistic (corrected)	44.2
P value	0.0006									P value	<0.0001									P value	0.0001						P value	<0.0001						P value	<0.0001
P value summary	***									P value summary	****									P value summary	***						P value summary	****						P value summary	****
Are SDs significantly different (P < 0.05)?	Yes									Are SDs significantly different (P < 0.05)?	Yes									Are SDs significantly different (P < 0.05)?	Yes						Are SDs significantly different (P < 0.05)?	Yes						Are SDs significantly different (P < 0.05)?	Yes
ANOVA table	SS	DF	MS	F (DFn, DFd)	P value					ANOVA table	SS	DF	MS	F (DFn, DFd)	P value					ANOVA table	SS	DF	MS	F (DFn, DFd)	P value		ANOVA table	SS	DF	MS	F (DFn, DFd)	P value		ANOVA table	SS	DF	MS	F (DFn, DFd)	P value
Treatment (between columns)	1.407	3	0.4689	F (3, 12) = 32.92	P<0.0001					Treatment (between columns)	6.394	3	2.131	F (3, 12) = 5.807	P=0.0109					Treatment (between columns)	1.962	3	0.654	F (3, 12) = 5.141	P=0.0163		Treatment (between columns)	0.5981	3	0.1994	F (3, 12) = 27.81	P<0.0001		Treatment (between columns)	1.662	3	0.5541	F (3, 12) = 5.608	P=0.0122
Residual (within columns)	0.1709	12	0.01424							Residual (within columns)	4.404	12	0.367							Residual (within columns)	1.527	12	0.1272				Residual (within columns)	0.08603	12	0.007169				Residual (within columns)	1.186	12	0.0988
Total	1.578	15								Total	10.8	15								Total	3.488	15					Total	0.6842	15					Total	2.848	15
Data summary										Data summary										Data summary							Data summary							Data summary
Number of treatments (columns)	4									Number of treatments (columns)	4									Number of treatments (columns)	4						Number of treatments (columns)	4						Number of treatments (columns)	4
Number of values (total)	16									Number of values (total)	16									Number of values (total)	16						Number of values (total)	16						Number of values (total)	16
Number of families	1																										Number of families	1						Number of families	1
Number of comparisons per family	3									Number of families	1																Number of comparisons per family	3						Number of comparisons per family	3
Alpha	0.05									Number of comparisons per family	3									Number of families	1						Alpha	0.05						Alpha	0.05
										Alpha	0.05									Number of comparisons per family	3
Dunnett's multiple comparisons test	Mean Diff.	95.00% CI of diff.	Below threshold?	Summary	Adjusted P Value	E-?														Alpha	0.05						Dunnett's multiple comparisons test	Mean Diff.	95.00% CI of diff.	Below threshold?	Summary	Adjusted P Value	E-?	Dunnett's multiple comparisons test	Mean Diff.	95.00% CI of diff.	Below threshold?	Summary	Adjusted P Value	E-?
10Gy vs. Control	-0.725	-0.9514 to -0.4986	Yes	****	<0.0001	A	Control			Dunnett's multiple comparisons test	Mean Diff.	95.00% CI of diff.	Below threshold?	Summary	Adjusted P Value	E-?											10Gy vs. Control	-0.4828	-0.6434 to -0.3221	Yes	****	<0.0001	A	10Gy vs. Control	0.07248	-0.5238 to 0.6688	No	ns	0.976	A	Control
10Gy vs. 10Gy+AB	0.0025	-0.2239 to 0.2289	No	ns	>0.9999	F	10Gy+AB			10Gy vs. Control	1.518	0.3689 to 2.667	Yes	*	0.0106	A	Control			Dunnett's multiple comparisons test	Mean Diff.	95.00% CI of diff.	Below threshold?	Summary	Adjusted P Value	E-?	10Gy vs. 10Gy+AB	-0.04	-0.2006 to 0.1206	No	ns	0.8435	F	10Gy vs. 10Gy+AB	0.67	0.07368 to 1.266	Yes	*	0.0276	F	10Gy+AB
10Gy vs. 10Gy+BB	-0.235	-0.4614 to -0.008584	Yes	*	0.0417	G	10Gy+BB			10Gy vs. 10Gy+AB	0.8813	-0.2680 to 2.031	No	ns	0.1467	F	10Gy+AB			10Gy vs. Control	0.6225	-0.05414 to 1.299	No	ns	0.073	A	10Gy vs. 10Gy+BB	-0.085	-0.2456 to 0.07563	No	ns	0.3857	G	10Gy vs. 10Gy+BB	0.6875	0.09118 to 1.284	Yes	*	0.024	G	10Gy+BB
										10Gy vs. 10Gy+BB	1.562	0.4131 to 2.712	Yes	**	0.0088	G	10Gy+BB			10Gy vs. 10Gy+AB	0.0075	-0.6691 to 0.6841	No	ns	>0.9999	F
Test details	Mean 1	Mean 2	Mean Diff.	SE of diff.	n1	n2	q	DF												10Gy vs. 10Gy+BB	0.77	0.09336 to 1.447	Yes	*	0.0258	G	Test details	Mean 1	Mean 2	Mean Diff.	SE of diff.	n1	n2	Test details	Mean 1	Mean 2	Mean Diff.	SE of diff.	n1	n2	q	DF
10Gy vs. Control	0.2775	1.003	-0.725	0.08439	4	4	8.591	12		Test details	Mean 1	Mean 2	Mean Diff.	SE of diff.	n1	n2	q	DF									10Gy vs. Control	0.5175	1	-0.4828	0.05987	4	4	10Gy vs. Control	1.073	1	0.07248	0.2223	4	4	0.3261	12
10Gy vs. 10Gy+AB	0.2775	0.275	0.0025	0.08439	4	4	0.02962	12		10Gy vs. Control	2.518	1	1.518	0.4284	4	4	3.544	12		Test details	Mean 1	Mean 2	Mean Diff.	SE of diff.	n1	n2	10Gy vs. 10Gy+AB	0.5175	0.5575	-0.04	0.05987	4	4	10Gy vs. 10Gy+AB	1.073	0.4025	0.67	0.2223	4	4	3.014	12
10Gy vs. 10Gy+BB	0.2775	0.5125	-0.235	0.08439	4	4	2.785	12		10Gy vs. 10Gy+AB	2.518	1.637	0.8813	0.4284	4	4	2.057	12		10Gy vs. Control	1.625	1.003	0.6225	0.2522	4	4	10Gy vs. 10Gy+BB	0.5175	0.6025	-0.085	0.05987	4	4	10Gy vs. 10Gy+BB	1.073	0.385	0.6875	0.2223	4	4	3.093	12
										10Gy vs. 10Gy+BB	2.518	0.9561	1.562	0.4284	4	4	3.647	12		10Gy vs. 10Gy+AB	1.625	1.618	0.0075	0.2522	4	4
																				10Gy vs. 10Gy+BB	1.625	0.855	0.77	0.2522	4	4

## Sheet: Fig.6B
PDGFRA										P21										P16									CASPASE3									IL6
0Gy	10Gy	10Gy+AB	10Gy+BB							0Gy	10Gy	10Gy+AB	10Gy+BB							0Gy	10Gy	10Gy+AB	10Gy+BB						0Gy	10Gy	10Gy+AB	10Gy+BB						0Gy	10Gy	10Gy+AB	10Gy+BB
1	0.86	0.54	1.38							1	2.07	1.46	1.09							1.03	1.77	2.32	0.99						1	3.42	5.54	4.74						1	0.5	0.81	0.9
1	0.33	0.44	0.44							1	1.56	1.22	1.09							1	2.64	3.38	3.02						1	1.47	1.86	2.71						1.01	2.72	2.14	2.41
1	0.41	0.45	0.29							1	2.15	1.18	1.33							1.03	1.91	1.31	1.23						1	0.93	1.96	1.3						1	0.32	0.62	0.36
1.02	0.13	0.06	0.2							1.01	2.34	0.24	0.63							1.01	2.61	1.39	2.23						1.01	6.07	5.65	10.93						1	1.26	2.19	1.66
																																						ANOVA summary
ANOVA summary										ANOVA summary										ANOVA summary									ANOVA summary									F	0.2103
F	2.984									F	8.39									F	2.353								F	1.551								P value	0.8873
P value	0.0737									P value	0.0028									P value	0.1236								P value	0.2523								P value summary	ns
P value summary	ns									P value summary	**									P value summary	ns								P value summary	ns								Significant diff. among means (P < 0.05)?	No
Significant diff. among means (P < 0.05)?	No									Significant diff. among means (P < 0.05)?	Yes									Significant diff. among means (P < 0.05)?	No								Significant diff. among means (P < 0.05)?	No								R squared	0.04996
R squared	0.4273									R squared	0.6772									R squared	0.3704								R squared	0.2794
																																						Brown-Forsythe test
Brown-Forsythe test										Brown-Forsythe test										ANOVA table	SS	DF	MS	F (DFn, DFd)	P value				Brown-Forsythe test									F (DFn, DFd)	3.367 (3, 12)
F (DFn, DFd)	1.057 (3, 12)									F (DFn, DFd)	0.8922 (3, 12)									Treatment (between columns)	3.575	3	1.192	F (3, 12) = 2.353	P=0.1236				F (DFn, DFd)	2.279 (3, 12)								P value	0.0549
P value	0.4034									P value	0.4732									Residual (within columns)	6.078	12	0.5065						P value	0.1316								P value summary	ns
P value summary	ns									P value summary	ns									Total	9.654	15							P value summary	ns								Are SDs significantly different (P < 0.05)?	No
Are SDs significantly different (P < 0.05)?	No									Are SDs significantly different (P < 0.05)?	No																		Are SDs significantly different (P < 0.05)?	No
																				Data summary																		Bartlett's test
Bartlett's test										Bartlett's test										Number of treatments (columns)	4								Bartlett's test									Bartlett's statistic (corrected)	24.81
Bartlett's statistic (corrected)	18.47									Bartlett's statistic (corrected)	21.23									Number of values (total)	16								Bartlett's statistic (corrected)	32.36								P value	<0.0001
P value	0.0004									P value	<0.0001																		P value	<0.0001								P value summary	****
P value summary	***									P value summary	****									Number of families	1								P value summary	****								Are SDs significantly different (P < 0.05)?	Yes
Are SDs significantly different (P < 0.05)?	Yes									Are SDs significantly different (P < 0.05)?	Yes									Number of comparisons per family	3								Are SDs significantly different (P < 0.05)?	Yes
																				Alpha	0.05																	ANOVA table	SS	DF	MS	F (DFn, DFd)	P value
ANOVA table	SS	DF	MS	F (DFn, DFd)	P value					ANOVA table	SS	DF	MS	F (DFn, DFd)	P value														ANOVA table	SS	DF	MS	F (DFn, DFd)	P value				Treatment (between columns)	0.426	3	0.142	F (3, 12) = 0.2103	P=0.8873
Treatment (between columns)	0.9772	3	0.3257	F (3, 12) = 2.984	P=0.0737					Treatment (between columns)	3.057	3	1.019	F (3, 12) = 8.390	P=0.0028					Dunnett's multiple comparisons test	Mean Diff.	95.00% CI of diff.	Below threshold?	Summary	Adjusted P Value	E-?			Treatment (between columns)	32.55	3	10.85	F (3, 12) = 1.551	P=0.2523				Residual (within columns)	8.101	12	0.6751
Residual (within columns)	1.31	12	0.1092							Residual (within columns)	1.458	12	0.1215							10Gy vs. 0Gy	1.215	-0.1352 to 2.565	No	ns	0.0802	A	0Gy		Residual (within columns)	83.96	12	6.996						Total	8.527	15
Total	2.287	15								Total	4.515	15								10Gy vs. 10Gy + AB	0.1325	-1.218 to 1.483	No	ns	0.9869	F	10Gy + AB		Total	116.5	15
																				10Gy vs. 10G + BB	0.365	-0.9852 to 1.715	No	ns	0.8112	G	10G + BB											Data summary
Data summary										Data summary																			Data summary									Number of treatments (columns)	4
Number of treatments (columns)	4									Number of treatments (columns)	4									Test details	Mean 1	Mean 2	Mean Diff.	SE of diff.	n1	n2	q	DF	Number of treatments (columns)	4								Number of values (total)	16
Number of values (total)	16									Number of values (total)	16									10Gy vs. 0Gy	2.233	1.018	1.215	0.5032	4	4	2.414	12	Number of values (total)	16
																				10Gy vs. 10Gy + AB	2.233	2.1	0.1325	0.5032	4	4	0.2633	12										Number of families	1
Number of families	1									Number of families	1									10Gy vs. 10G + BB	2.233	1.868	0.365	0.5032	4	4	0.7253	12	Number of families	1								Number of comparisons per family	3
Number of comparisons per family	3									Number of comparisons per family	3																		Number of comparisons per family	3								Alpha	0.05
Alpha	0.05									Alpha	0.05																		Alpha	0.05
																																						Dunnett's multiple comparisons test	Mean Diff.	95.00% CI of diff.	Below threshold?	Summary	Adjusted P Value	A-?
Dunnett's multiple comparisons test	Mean Diff.	95.00% CI of diff.	Below threshold?	Summary	Adjusted P Value	E-?				Bonferroni's multiple comparisons test	Mean Diff.	95.00% CI of diff.	Below threshold?	Summary	Adjusted P Value	E-?													Dunnett's multiple comparisons test	Mean Diff.	95.00% CI of diff.	Below threshold?	Summary	Adjusted P Value	A-?			0Gy vs. 10Gy	-0.1975	-1.756 to 1.361	No	ns	0.973	E	10Gy
10Gy vs. 0Gy	-0.5725	-1.199 to 0.05430	No	ns	0.0753	A	0Gy			10Gy vs. 0Gy	1.028	0.3425 to 1.712	Yes	**	0.0039	A	0Gy												0Gy vs. 10Gy	-1.97	-6.988 to 3.048	No	ns	0.6032	E	10Gy		0Gy vs. 10Gy + AB	-0.4375	-1.996 to 1.121	No	ns	0.7948	F	10Gy + AB
10Gy vs. 10Gy + AB	0.06	-0.5668 to 0.6868	No	ns	0.9878	F	10Gy + AB			10Gy vs. 10Gy + AB	1.005	0.3200 to 1.690	Yes	**	0.0046	F	10Gy + AB												0Gy vs. 10Gy + AB	-2.75	-7.768 to 2.268	No	ns	0.3599	F	10Gy + AB		0Gy vs. 10G + BB	-0.33	-1.889 to 1.229	No	ns	0.8942	G	10G + BB
10Gy vs. 10G + BB	-0.145	-0.7718 to 0.4818	No	ns	0.8686	G	10G + BB			10Gy vs. 10G + BB	0.995	0.3100 to 1.680	Yes	**	0.0049	G	10G + BB												0Gy vs. 10G + BB	-3.918	-8.935 to 1.100	No	ns	0.138	G	10G + BB
																																						Test details	Mean 1	Mean 2	Mean Diff.	SE of diff.	n1	n2	q	DF
Test details	Mean 1	Mean 2	Mean Diff.	SE of diff.	n1	n2	q	DF		Test details	Mean 1	Mean 2	Mean Diff.	SE of diff.	n1	n2	t	DF											Test details	Mean 1	Mean 2	Mean Diff.	SE of diff.	n1	n2	q	DF	0Gy vs. 10Gy	1.003	1.2	-0.1975	0.581	4	4	0.3399	12
10Gy vs. 0Gy	0.4325	1.005	-0.5725	0.2336	4	4	2.451	12		10Gy vs. 0Gy	2.03	1.003	1.028	0.2464	4	4	4.169	12											0Gy vs. 10Gy	1.003	2.973	-1.97	1.87	4	4	1.053	12	0Gy vs. 10Gy + AB	1.003	1.44	-0.4375	0.581	4	4	0.753	12
10Gy vs. 10Gy + AB	0.4325	0.3725	0.06	0.2336	4	4	0.2568	12		10Gy vs. 10Gy + AB	2.03	1.025	1.005	0.2464	4	4	4.078	12											0Gy vs. 10Gy + AB	1.003	3.753	-2.75	1.87	4	4	1.47	12	0Gy vs. 10G + BB	1.003	1.333	-0.33	0.581	4	4	0.568	12
10Gy vs. 10G + BB	0.4325	0.5775	-0.145	0.2336	4	4	0.6207	12		10Gy vs. 10G + BB	2.03	1.035	0.995	0.2464	4	4	4.037	12											0Gy vs. 10G + BB	1.003	4.92	-3.918	1.87	4	4	2.095	12

## Sheet: Fig.6C
P21									NFKB
10Gy	10Gy+AB	10Gy+BB							10Gy	10Gy+AB	10Gy+BB
1.039	0.996	0.612							1.44478	1.47744	1.12933
1.142	1.114	0.371							1.60697	1.19215	0.578102
0.929	0.788279	0.418							1.585	1.537	1.297
1.157	1.479	0.95							1.342	1.093	1.153
ANOVA summary									ANOVA summary
F	5.926								F	3.919
P value	0.0228								P value	0.0597
P value summary	*								P value summary	ns
Significant diff. among means (P < 0.05)?	Yes								Significant diff. among means (P < 0.05)?	No
R squared	0.5684								R squared	0.4655
Brown-Forsythe test									Brown-Forsythe test
F (DFn, DFd)	0.8745 (2, 9)								F (DFn, DFd)	0.3768 (2, 9)
P value	0.4497								P value	0.6964
P value summary	ns								P value summary	ns
Are SDs significantly different (P < 0.05)?	No								Are SDs significantly different (P < 0.05)?	No
Bartlett's test									Bartlett's test
Bartlett's statistic (corrected)	2.424								Bartlett's statistic (corrected)	2.04
P value	0.2976								P value	0.3606
P value summary	ns								P value summary	ns
Are SDs significantly different (P < 0.05)?	No								Are SDs significantly different (P < 0.05)?	No
ANOVA table	SS	DF	MS	F (DFn, DFd)	P value				ANOVA table	SS	DF	MS	F (DFn, DFd)	P value
Treatment (between columns)	0.6491	2	0.3245	F (2, 9) = 5.926	P=0.0228				Treatment (between columns)	0.4236	2	0.2118	F (2, 9) = 3.919	P=0.0597
Residual (within columns)	0.4929	9	0.05476						Residual (within columns)	0.4864	9	0.05404
Total	1.142	11							Total	0.91	11
Number of families	1								Data summary
Number of comparisons per family	2								Number of treatments (columns)	3
Alpha	0.05								Number of values (total)	12
Dunnett's multiple comparisons test	Mean Diff.	95.00% CI of diff.	Below threshold?	Summary	Adjusted P Value	A-?			Number of families	1
10Gy vs. 10Gy + AB	-0.02757	-0.4601 to 0.4050	No	ns	0.9799	B	10Gy + AB		Number of comparisons per family	2
10Gy vs. 10Gy + BB	0.479	0.04644 to 0.9116	Yes	*	0.0319	C	10Gy + BB		Alpha	0.05
Test details	Mean 1	Mean 2	Mean Diff.	SE of diff.	n1	n2	q	DF	Dunnett's multiple comparisons test	Mean Diff.	95.00% CI of diff.	Below threshold?	Summary	Adjusted P Value	A-?
10Gy vs. 10Gy + AB	1.067	1.094	-0.02757	0.1655	4	4	0.1666	9	10Gy vs. 10Gy + AB	0.1698	-0.2599 to 0.5995	No	ns	0.5075	B	10Gy + AB
10Gy vs. 10Gy + BB	1.067	0.5878	0.479	0.1655	4	4	2.895	9	10Gy vs. 10Gy + BB	0.4553	0.02562 to 0.8850	Yes	*	0.0389	C	10Gy + BB
									Test details	Mean 1	Mean 2	Mean Diff.	SE of diff.	n1	n2	q	DF
									10Gy vs. 10Gy + AB	1.495	1.325	0.1698	0.1644	4	4	1.033	9
									10Gy vs. 10Gy + BB	1.495	1.039	0.4553	0.1644	4	4	2.77	9

## Sheet: Fig.6D
P21									NFKB
10Gy	10Gy+AB	10Gy+BB							10Gy	10Gy+AB	10Gy+BB
1.039	0.996	0.612							1	0.79	1.096
1.142	1.114	0.371							1.207	1.163	0.942
0.929	0.788279	0.418							2.177	2.552	0.916
1.157	1.479	0.95							1.309	1.757	0.608
ANOVA summary									ANOVA summary
F	5.926								F	1.685
P value	0.0228								P value	0.2391
P value summary	*								P value summary	ns
Significant diff. among means (P < 0.05)?	Yes								Significant diff. among means (P < 0.05)?	No
R squared	0.5684								R squared	0.2724
Brown-Forsythe test									Brown-Forsythe test
F (DFn, DFd)	0.8745 (2, 9)								F (DFn, DFd)	1.922 (2, 9)
P value	0.4497								P value	0.2019
P value summary	ns								P value summary	ns
Are SDs significantly different (P < 0.05)?	No								Are SDs significantly different (P < 0.05)?	No
Bartlett's test									Bartlett's test
Bartlett's statistic (corrected)	2.424								Bartlett's statistic (corrected)	3.68
P value	0.2976								P value	0.1588
P value summary	ns								P value summary	ns
Are SDs significantly different (P < 0.05)?	No								Are SDs significantly different (P < 0.05)?	No
ANOVA table	SS	DF	MS	F (DFn, DFd)	P value				ANOVA table	SS	DF	MS	F (DFn, DFd)	P value
Treatment (between columns)	0.6491	2	0.3245	F (2, 9) = 5.926	P=0.0228				Treatment (between columns)	1.013	2	0.5065	F (2, 9) = 1.685	P=0.2391
Residual (within columns)	0.4929	9	0.05476						Residual (within columns)	2.706	9	0.3006
Total	1.142	11							Total	3.719	11
Data summary									Data summary
Number of treatments (columns)	3								Number of treatments (columns)	3
Number of values (total)	12								Number of values (total)	12
Number of families	1								Number of families	1
Number of comparisons per family	2								Number of comparisons per family	2
Alpha	0.05								Alpha	0.05
Dunnett's multiple comparisons test	Mean Diff.	95.00% CI of diff.	Below threshold?	Summary	Adjusted P Value	A-?			Dunnett's multiple comparisons test	Mean Diff.	95.00% CI of diff.	Below threshold?	Summary	Adjusted P Value	A-?
10Gy vs. 10Gy + AB	-0.02757	-0.4601 to 0.4050	No	ns	0.9799	B	10Gy + AB		10Gy vs. 10Gy + AB	-0.1423	-1.156 to 0.8713	No	ns	0.9078	B	10Gy + AB
10Gy vs. 10Gy + BB	0.479	0.04644 to 0.9116	Yes	*	0.0319	C	10Gy + BB		10Gy vs. 10Gy + BB	0.5328	-0.4808 to 1.546	No	ns	0.3298	C	10Gy + BB
Test details	Mean 1	Mean 2	Mean Diff.	SE of diff.	n1	n2	q	DF	Test details	Mean 1	Mean 2	Mean Diff.	SE of diff.	n1	n2	q	DF
10Gy vs. 10Gy + AB	1.067	1.094	-0.02757	0.1655	4	4	0.1666	9	10Gy vs. 10Gy + AB	1.423	1.566	-0.1423	0.3877	4	4	0.3669	9
10Gy vs. 10Gy + BB	1.067	0.5878	0.479	0.1655	4	4	2.895	9	10Gy vs. 10Gy + BB	1.423	0.8905	0.5328	0.3877	4	4	1.374	9
