# Supplementary figures and images for: Therapeutic effects of PDGF-AB/BB against cellular senescence in human intervertebral disc
Source: eLife journal article supplement (doi:10.7554/elife.103073), 2024-12-18

NP

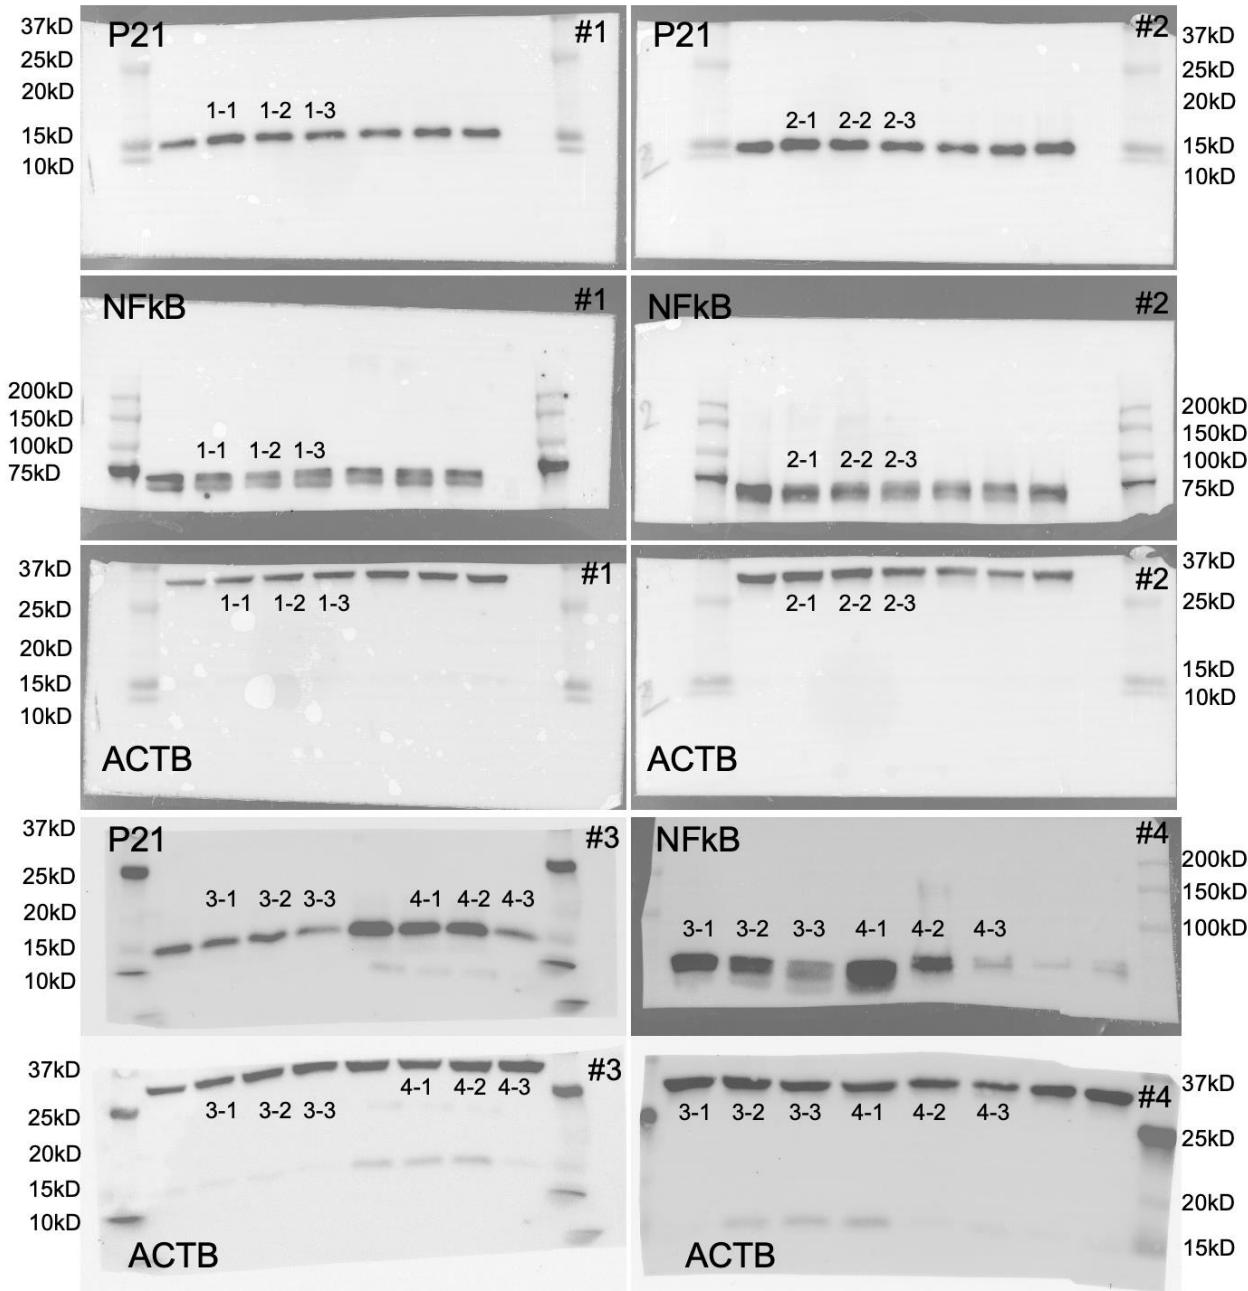

AF

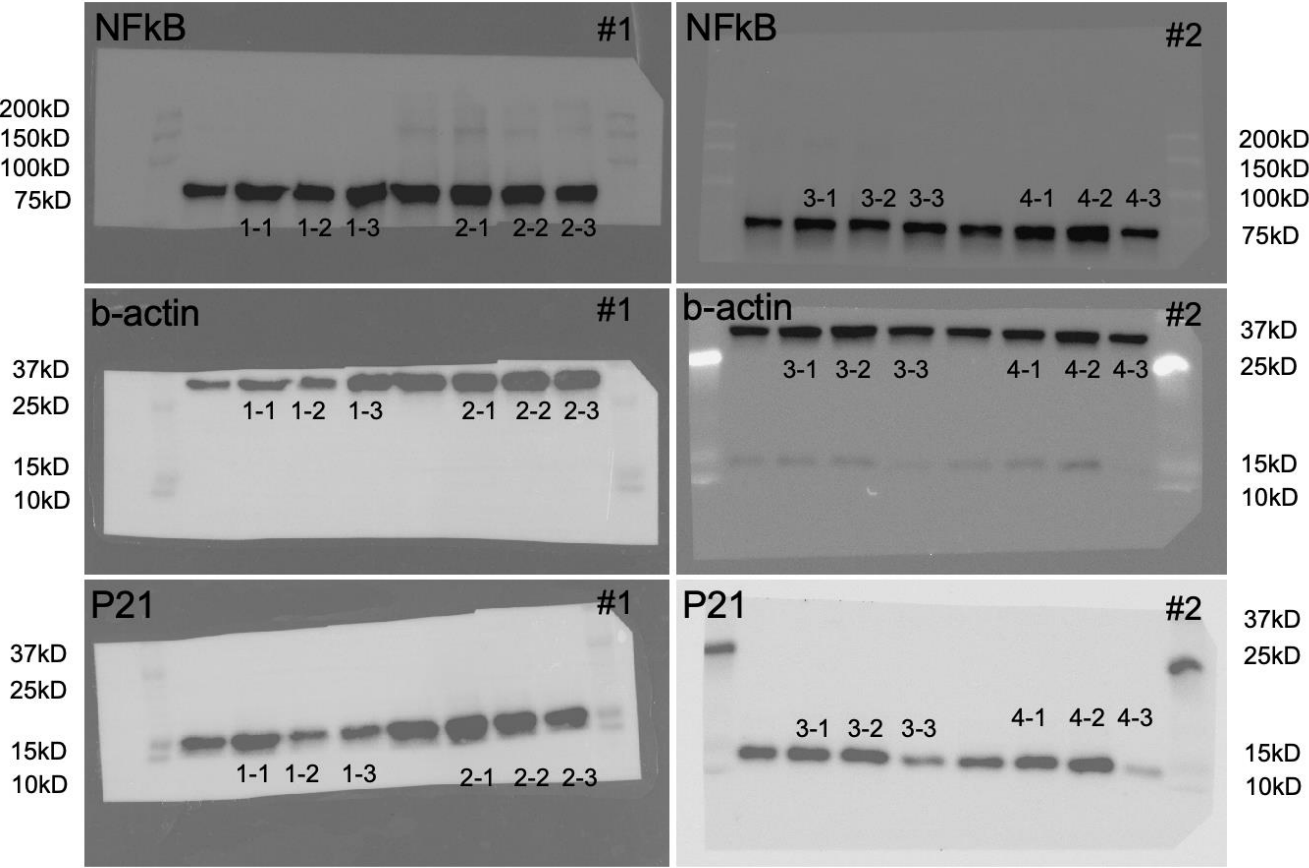

Supplement: fig6-data2 [file elife-103073-fig6-data2-v1.zip]
